# Supplementary material
Source: Springer Nature journal article supplement (https://www.springermedizin.de/resource/supplementary/12967_2010_735_MOESM5_ESM.pdf/9577410)

**A**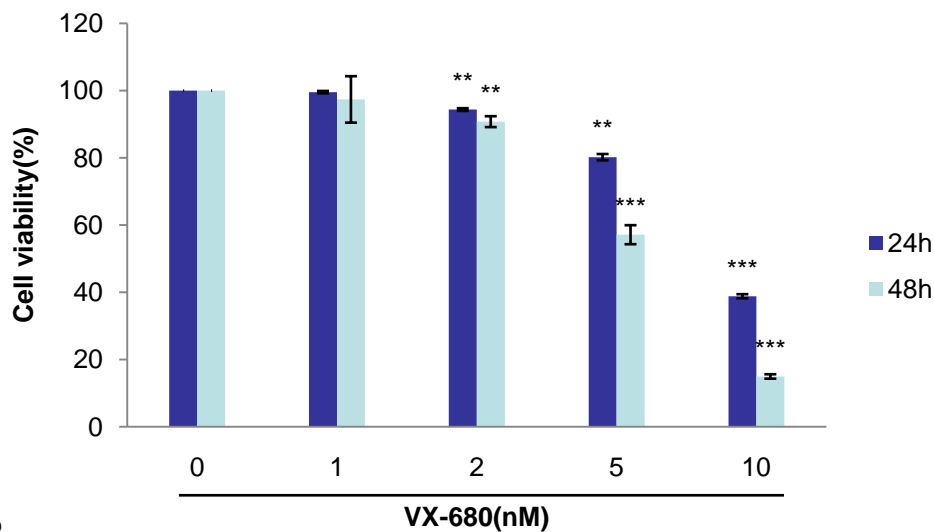**B**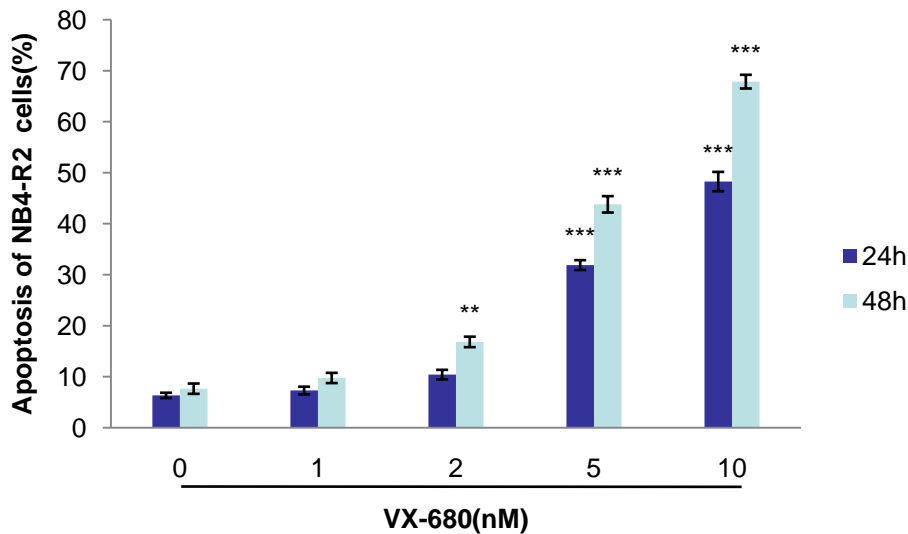

Supplement: MOESM5 [file 9577410]
